# Supplementary material for: Risk Communication and Factors Influencing Private Well Testing Behavior: A Systematic Scoping Review
Source: MDPI journal article supplement (doi:10.3390/ijerph16224333), 2019-11-07
Supplement: s1 [file s1]

**Table S1:** Summary of select demographic information from included studies

| Author, Year                 | N=               | Annual Household Income (\$USD*)   |                          | Education Level                                             |                                        | Age (years)                        |                          | Race/Ethnicity (% White) |                          |
|------------------------------|------------------|------------------------------------|--------------------------|-------------------------------------------------------------|----------------------------------------|------------------------------------|--------------------------|--------------------------|--------------------------|
|                              |                  | Study participants                 | General study population | Study participants                                          | General study population               | Study participants                 | General study population | Study participants       | General study population |
| Chappells, 2015 <sup>a</sup> | 420              | 43% ≥ \$Can 100,000                | NR                       | 80% college/trade school or university                      | NR                                     | 54% ≥ 55 years                     | NR                       | NR                       | NR                       |
| Fizer, 2018                  | 18               | \$62,500 <sup>b</sup>              | \$63,791 <sup>c</sup>    | 70% with associates degree or higher <sup>c</sup>           | 57% with associates degree or higher   | 11% ≥ 65 years <sup>c</sup>        | 9% ≥ 65 years            | 28% <sup>c</sup>         | 62%                      |
| Flanagan, 2015               | 419              | \$40,000-\$59,000 <sup>b</sup>     | NR                       | Technical or community college <sup>b</sup>                 | NR                                     | 55 years <sup>c</sup>              | NR                       | NR                       | NR                       |
| Flanagan, 2016a              | 532              | \$125,000-\$150,000 <sup>b,d</sup> | \$121,095 <sup>b</sup>   | 71% with Bachelor's degree                                  | 56% with Bachelor's degree             | 58 years <sup>b</sup>              | 51 years <sup>b</sup>    | NR                       | NR                       |
| Flanagan, 2016b              | 670              | \$100,001-\$150,000 <sup>b,e</sup> | NR                       | 60-75% with Bachelor's degree or higher <sup>e</sup>        | NR                                     | 57-59 years <sup>b,e</sup>         | NR                       | NR                       | NR                       |
| Flanagan, 2016c              | 972              | NR                                 | NR                       | NR                                                          | NR                                     | NR                                 | NR                       | NR                       | NR                       |
| Hexemer, 2008                | 97               | NR                                 | NR                       | NR                                                          | NR                                     | NR                                 | NR                       | NR                       | NR                       |
| Hoppe, 2011                  | N/A              | NR                                 | NR                       | NR                                                          | NR                                     | NR                                 | NR                       | NR                       | NR                       |
| Imgrund, 2011                | 22               | NR                                 | NR                       | NR                                                          | NR                                     | NR                                 | NR                       | NR                       | NR                       |
| Jones, 2005                  | 15               | NR                                 | NR                       | NR                                                          | NR                                     | NR                                 | NR                       | 100%                     | NR                       |
| Jones, 2006                  | 239 <sup>*</sup> | 47% > \$Can 70,000                 | 31% > \$Can 70,000       | 22% with university or graduate degree                      | 16% with university or graduate degree | 60% ≥ 50 years                     | 41% ≥ 50 years           | NR                       | NR                       |
| Kreutzwiser, 2011            | 1,386            | NR                                 | NR                       | 100% with college/trade school or university                | NR                                     | 67% ≥ 50 years                     | NR                       | NR                       | NR                       |
| Lewandowski, 2008            | 483              | NR                                 | NR                       | NR                                                          | NR                                     | NR                                 | NR                       | NR                       | NR                       |
| Malecki, 2017                | 460              | 22% > \$99,999                     | 19% > \$100,000          | 37% with Bachelor's degree or higher                        | 31% with Bachelor's degree or higher   | 34% > 60 years                     | 23% > 60 years           | NR                       | NR                       |
| Paul, 2015                   | N/A              | NR                                 | NR                       | NR                                                          | NR                                     | NR                                 | NR                       | NR                       | NR                       |
| Postma, 2011                 | 188              | 82% < \$49,999                     | NR                       | 73% with college/trade school or higher                     | NR                                     | 33 years <sup>f</sup>              | NR                       | 92%                      | NR                       |
| Renaud, 2011                 | 515              | 59% to 75% < \$Can 59,999          | NR                       | 40% to 56% with college/trade school or higher <sup>g</sup> | NR                                     | 41% to 55% > 55 years <sup>g</sup> | NR                       | NR                       | NR                       |
| Straub, 2014                 | 714              | NR                                 | NR                       | NR                                                          | NR                                     | NR                                 | NR                       | NR                       | NR                       |

\* \$USD unless otherwise noted

NR - Not reported or not able to report

<sup>a</sup> Used overall study population characteristics<sup>b</sup> Median value or category<sup>c</sup> Subcategory is less than maximum N (when this information is reported)<sup>d</sup> Data selected from representative sample<sup>e</sup> Range includes median values from all intervention areas<sup>f</sup> Mean value<sup>g</sup> Range includes pre- and post-intervention respondents and intervention and non-intervention groups
